# Supplementary material
Source: PubMed Central journal article supplement (PMC6900744)
Supplement: pnas.1915778116.sapp.pdf [file pnas.1915778116.sapp.pdf]

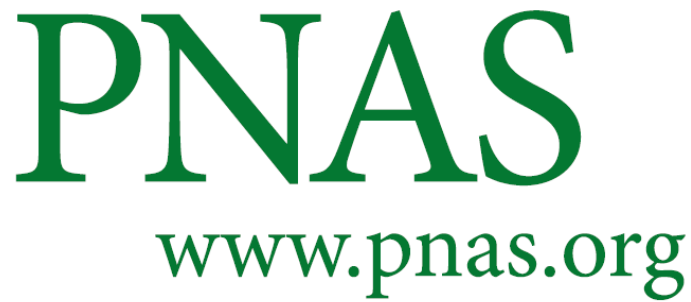

## Supplementary Information for

### **Imaging the dynamic recruitment of monocytes to the blood-brain barrier and specific brain regions during *Toxoplasma gondii* infection**

Christine A. Schneider, Dario X. Figueroa Velez, Ricardo Azevedo, Evelyn M. Hoover, Cuong Joseph Tran, Chelsie Lo, Omid Vadpey, Sunil P. Gandhi,  
and Melissa B. Lodoen

Corresponding author: Melissa B. Lodoen

Email: [mlodoen@uci.edu](mailto:mlodoen@uci.edu)

#### **This PDF file includes:**

Figures S1 to S7  
Tables S1 to S5  
Captions for movies S1 to S3  
Supplementary Materials & Methods

#### **Other supplementary materials for this manuscript include the following:**

Movies S1 to S3

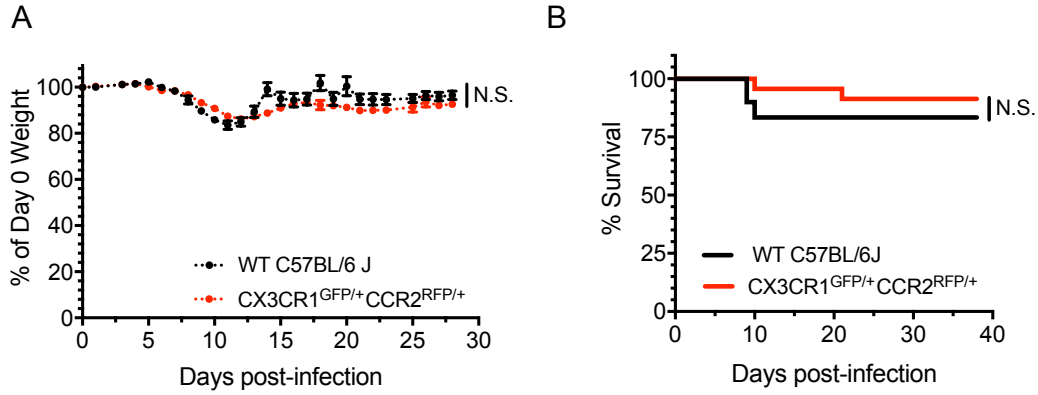

**Fig. S1. Weight loss and survival of CCR2<sup>RFP/+</sup>CX3CR1<sup>GFP/+</sup> mice infected with *T. gondii*.** Wild-type (WT) C57BL/6J mice and CCR2<sup>RFP/+</sup>CX3CR1<sup>GFP/+</sup> mice were infected with 200 type II *T. gondii* tachyzoites. **A)** Mice were monitored for weight loss. Weight loss curves were not significantly different between genotypes when compared by linear regression and were not significantly different at endpoint by Student's *t* test. **B)** Kaplan-Meier survival curves were generated.  $n_{WT} = 8$ ,  $n_{CCR2^{RFP/+}CX3CR1^{GFP/+}} = 13$ .

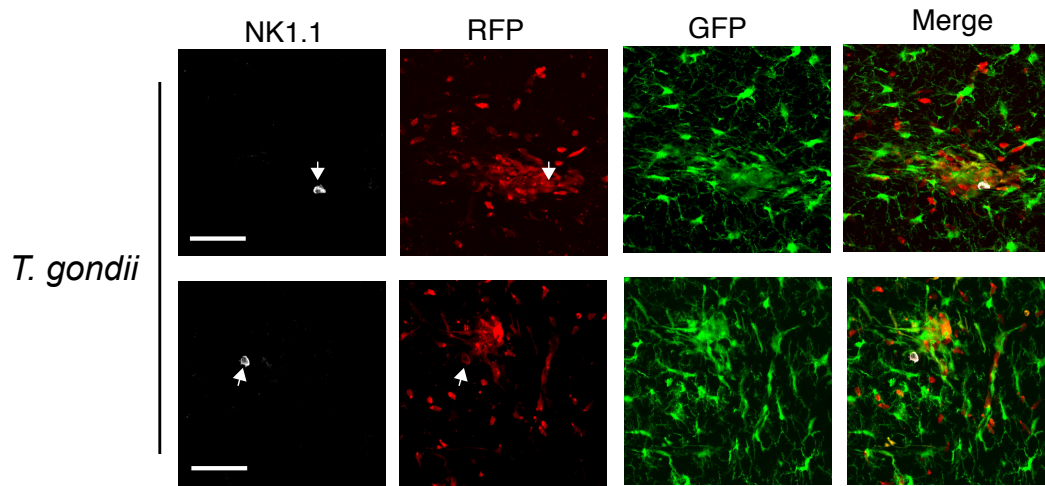

**Fig. S2. Rare detection of CCR2-RFP cells expressing the NK cell marker NK1.1 in the brain.** Brain sections from  $CCR2^{RFP/+}CX3CR1^{GFP/+}$  mice infected with *T. gondii* were stained with antibody against NK1.1 and visualized by confocal microscopy. Arrows indicate cells positive for NK1.1<sup>+</sup> staining. Scale bars = 50  $\mu$ m.

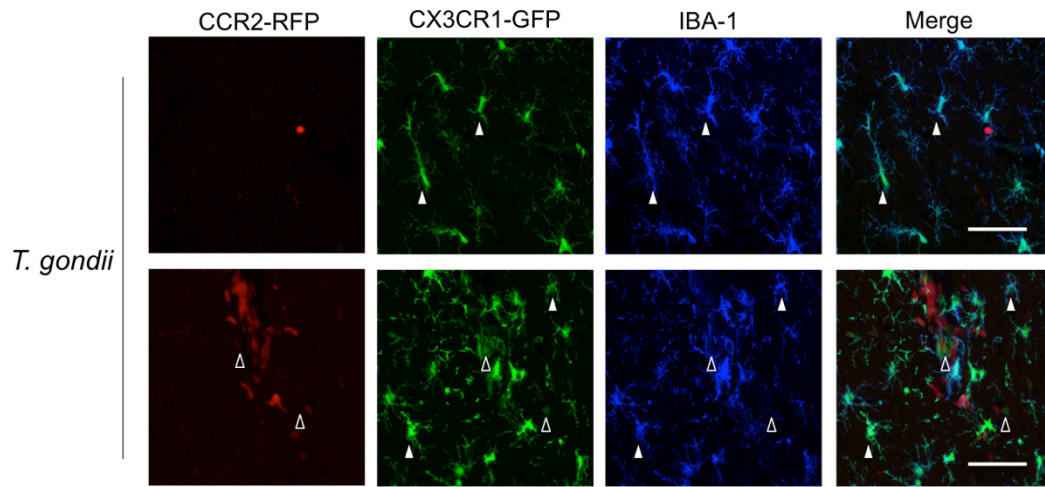

**Fig. S3. GFP<sup>hi</sup> cells are IBA-1<sup>+</sup>.** Brain sections from CCR2<sup>RFP/+</sup>CX3CR1<sup>GFP/+</sup> mice infected with *T. gondii* were stained with antibody against IBA-1 and visualized by confocal microscopy. Filled arrowheads indicate CX3CR1-GFP<sup>hi</sup> cells that are also positive for IBA-1 staining. Open arrowheads indicate CX3CR1-GFP<sup>lo</sup>, IBA-1<sup>-</sup> cells. Scale bars = 50  $\mu$ m.

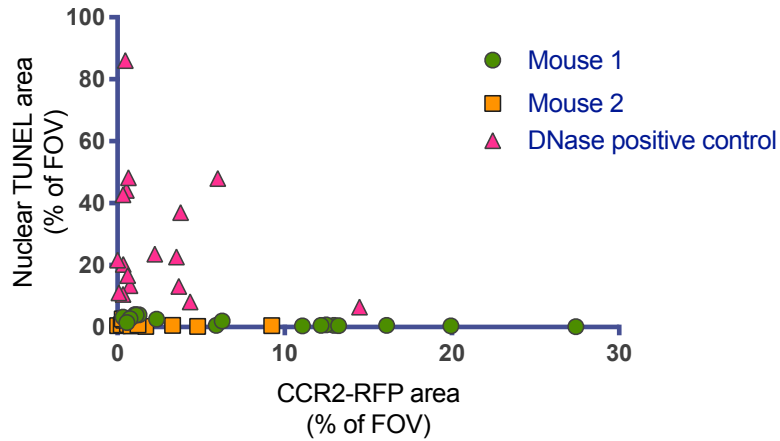

**Fig. S4. Cell apoptosis is not increased in regions of increased monocyte density in the brain.** Brain sections from  $CCR2^{RFP/+}CX3CR1^{GFP/+}$  mice infected with *T. gondii* were stained for DNA damage using TUNEL and compared to CCR2-RFP signal in the same field of view. Percent of the field containing RFP signal was plotted against the percent of thresholded nucleus area containing positive staining for DNA strand breaks. Separate brain sections from the same mice were incubated with DNase as a positive control and quantified in the same way.

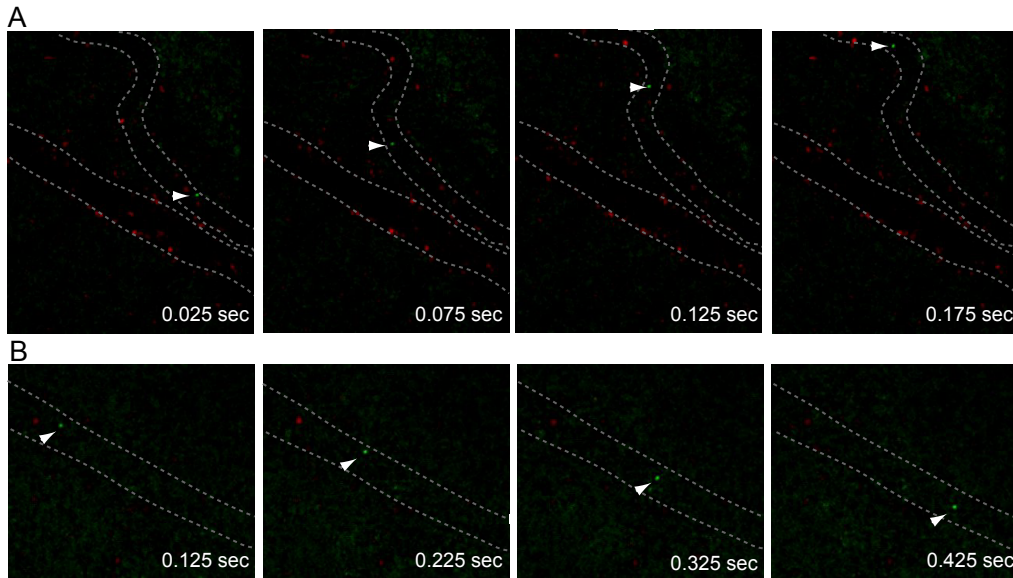

**Fig. S5. GFP<sup>+</sup> *T. gondii* are detectable by 2-photon microscopy.** A CCR2<sup>RFP/+</sup> mouse was injected I.V. with *T. gondii*, and the brain was imaged through a cranial window using 2-photon microscopy. Two separate fields of view are shown in (A) and (B). Arrowheads indicate GFP<sup>+</sup> parasites travelling through blood vessels, and the borders of the vessels were outlined with dotted lines.

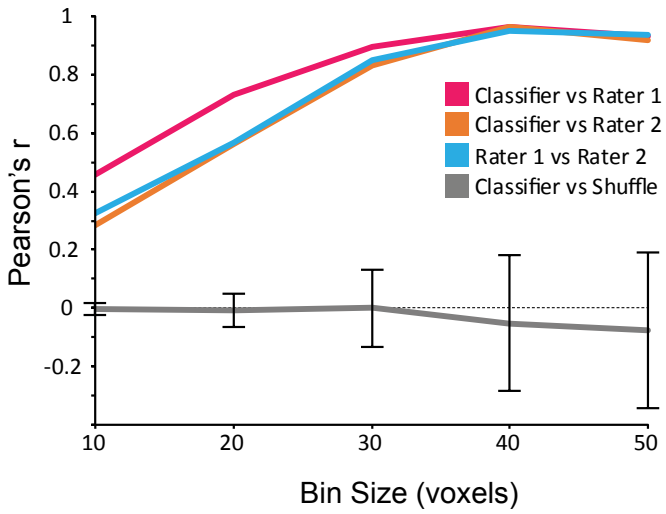

**Fig. S6. Validation of segmentation algorithm for CCR2-RFP cells in optically-cleared brains.** A representative substack of imaging data from a *T. gondii*-infected mouse at 15 dpi was quantified for CCR2-RFP cells by the classifier (segmentation pipeline) and by two independent human raters. Detected cells were spatially binned in 3D, and Pearson's  $r$  was calculated between raters for several bin sizes.

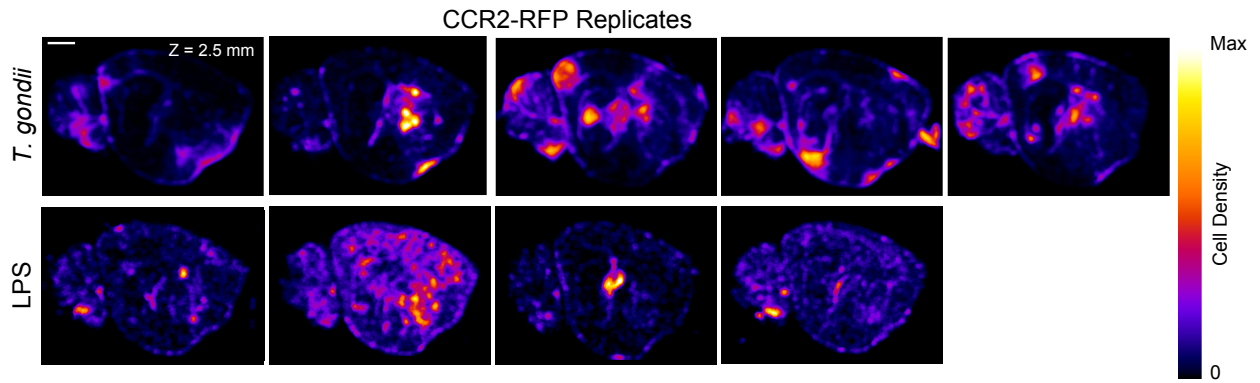

**Fig. S7. Individual heatmaps of monocyte density from mice injected with LPS or *T. gondii*.** CCR2<sup>RFP/+</sup> mice were injected with *T. gondii* or LPS, and the brains were harvested for optical clearing and lightsheet microscopy. The heatmaps of CCR2-RFP monocyte signal from each brain are shown. The mean heatmaps showing the combined data from all the mice in each condition are depicted in Figure 8A.



**Table S1. CD45<sup>+</sup> cell frequencies in the blood of control (PBS) or *T. gondii*-infected mice.**

|             | T cells      | B cells      | PMN         | NKT cells   | NK cells     | Monocytes   | CD11c        | Others       |
|-------------|--------------|--------------|-------------|-------------|--------------|-------------|--------------|--------------|
| PBS (early) | 23.22 ± 1.95 | 66.62 ± 2.01 | 0.63 ± 0.13 | 0.5 ± 0.14  | 3.61 ± 0.59  | 1.07 ± 0.2  | 2.23 ± 0.56  | 1.81 ± 0.24  |
| 4 DPI       | 35.14 ± 2.55 | 43.67 ± 3.22 | 0.99 ± 0.31 | 0.52 ± 0.09 | 8.18 ± 0.87  | 3.27 ± 0.48 | 4.21 ± 0.95  | 4.33 ± 0.47  |
| 6 DPI       | 25.45 ± 4    | 29.08 ± 2.87 | 4.2 ± 1.19  | 1.82 ± 0.71 | 14.88 ± 1.64 | 3.52 ± 0.37 | 10.02 ± 1.67 | 11.91 ± 3.41 |
| PBS (late)  | 29.58 ± 0.66 | 61.65 ± 1.67 | 0.27 ± 0.05 | 0.36 ± 0.02 | 2.29 ± 0.25  | 0.86 ± 0.09 | 1.35 ± 0.16  | 3.64 ± 0.89  |
| 10 DPI      | 45.32 ± 4.66 | 17.73 ± 4.67 | 1.1 ± 0.19  | 2.02 ± 0.11 | 9.54 ± 1.79  | 1.62 ± 0.19 | 8.78 ± 1.85  | 13.89 ± 1.12 |
| 15 DPI      | 55.13 ± 1.28 | 17.33 ± 2.8  | 3.6 ± 0.91  | 3.97 ± 0.4  | 6.12 ± 0.79  | 1.31 ± 0.33 | 3.3 ± 0.65   | 9.24 ± 2     |
| 38 DPI      | 31.24 ± 1.81 | 59.64 ± 1.46 | 0.11 ± 0.05 | 1.22 ± 0.19 | 0.95 ± 0.2   | 0.83 ± 0.28 | 2.67 ± 0.25  | 3.34 ± 0.71  |

**Table S2. CD45<sup>+</sup> cell frequencies in the brains of control (PBS) or *T. gondii*-infected mice.**

|              | PMN         | Monocytes     | T cells       | B cells     | microglia     | NK cells    |
|--------------|-------------|---------------|---------------|-------------|---------------|-------------|
| Mock (early) | 0.9 ± 0.26  | 0.76 ± 0.25   | 0.48 ± 0.23   | 0.05 ± 0.04 | 95.53 ± 0.65  | 1 ± 0.53    |
| 4 DPI        | 2.02 ± 0.68 | 1.26 ± 0.82   | 0.21 ± 0.08   | 0.01 ± 0.01 | 94.73 ± 1.76  | 0.8 ± 0.57  |
| 6 DPI        | 1.09 ± 0.61 | 2.15 ± 0.71   | 0.65 ± 0.43   | 0.05 ± 0.11 | 93.45 ± 2.96  | 1.05 ± 0.7  |
| Mock (late)  | 1.46 ± 0.85 | 0.76 ± 0.28   | 0.5 ± 0.12    | 0.03 ± 0.03 | 95.62 ± 1.08  | 0.69 ± 0.27 |
| 10 DPI       | 5.78 ± 1.51 | 11.38 ± 12.27 | 3.24 ± 3.42   | 0.05 ± 0.05 | 76.96 ± 15.94 | 1.74 ± 0.39 |
| 15 DPI       | 2.09 ± 2.13 | 46.61 ± 16.82 | 19.01 ± 9.4   | 0.14 ± 0.05 | 28.16 ± 11    | 1.05 ± 0.7  |
| 38 DPI       | 1.11 ± 1.01 | 17.66 ± 2.85  | 25.73 ± 16.72 | 0.48 ± 0.39 | 42.4 ± 17.65  | 0.69 ± 0.1  |

**Table S3. Antibody panel used for identifying immune cell populations in the blood and the brains of mice.**

| Antibody Target | Clone    | Flouochrome          | Company   |
|-----------------|----------|----------------------|-----------|
| CCR2            | SA203G11 | Brilliant Violet 421 | Biolegend |
| Ly6G            | 1A8      | Brilliant Violet 510 | Biolegend |
| NK1.1           | PK136    | Brilliant Violet 570 | Biolegend |
| CD11b           | M1/70    | Brilliant Violet 605 | Biolegend |
| CD45            | 30-F11   | APC                  | Biolegend |
| CD45            | 30-F11   | Brilliant Violet 785 | Biolegend |
| CD49b           | DX5      | PE                   | Biolegend |
| Ly6C            | HK1.4    | PerCP-Cy5.5          | Biolegend |
| CD19            | 6D5      | PE-Cy7               | Biolegend |
| CX3CR1          | SA011F11 | APC                  | Biolegend |
| CD3             | 17A2     | APC-Cy7              | Biolegend |

**Table S4. *T. gondii*-infected mouse brain regions significantly ( $p < 0.1$ ) over- or under-represented for monocyte density compared to shuffle analysis.**

\* This region contains an over-abundance of monocytes compared to the random shuffle; all other regions have fewer monocytes than the random shuffle.

| <b>Reference Atlas Region Name</b>                      | <b>Student's <i>t</i> test<br/>p-value</b> |
|---------------------------------------------------------|--------------------------------------------|
| Principal mammillary tract                              | 0.0412                                     |
| Interstitial nucleus of Cajal                           | 0.0917                                     |
| Anteroventral periventricular nucleus                   | 0.0358                                     |
| Vascular organ of the lamina terminalis                 | 0.0274                                     |
| Subparaventricular zone                                 | 0.0307                                     |
| Suprachiasmatic nucleus                                 | 0.0552                                     |
| Periventricular hypothalamic nucleus, preoptic part     | 0.0256                                     |
| Anterodorsal preoptic nucleus                           | 0.0557                                     |
| Tuberomammillary nucleus, dorsal part                   | 0.0219                                     |
| Anterior hypothalamic nucleus                           | 0.0709                                     |
| Ventromedial hypothalamic nucleus                       | 0.0307                                     |
| Ventral premammillary nucleus                           | 0.0540                                     |
| Accessory supraoptic group                              | 0.0335                                     |
| Periventricular hypothalamic nucleus, anterior part     | 0.0219                                     |
| Arcuate hypothalamic nucleus                            | 0.0335                                     |
| Periventricular hypothalamic nucleus, intermediate part | 0.0833                                     |
| Medial septal nucleus                                   | 0.0557                                     |
| Olfactory tubercle *                                    | 0.0557                                     |
| Septohippocampal nucleus                                | 0.0358                                     |
| Clastrum                                                | 0.0923                                     |
| Basolateral amygdalar nucleus, ventral part             | 0.0599                                     |
| Ammon's horn                                            | 0.0765                                     |
| Field CA2                                               | 0.0846                                     |
| Field CA1                                               | 0.0599                                     |
| Primary somatosensory area, barrel field, layer 5       | 0.0656                                     |
| Primary somatosensory area, barrel field, layer 6a      | 0.0736                                     |
| Primary somatosensory area, trunk                       | 0.0450                                     |
| Primary somatosensory area, trunk, layer 2/3            | 0.0358                                     |
| Primary somatosensory area, trunk, layer 5              | 0.0321                                     |
| Primary somatosensory area, trunk, layer 6a             | 0.0736                                     |
| Primary somatosensory area, trunk, layer 4              | 0.0256                                     |
| Primary somatosensory area, upper limb, layer 5         | 0.0814                                     |
| Primary somatosensory area, lower limb, layer 5         | 0.0596                                     |

|                                                   |        |
|---------------------------------------------------|--------|
| Primary somatosensory area, lower limb, layer 6a  | 0.0603 |
| Ventral auditory area, layer 5                    | 0.0506 |
| Ventral auditory area, layer 6a                   | 0.0596 |
| Dorsal auditory area, layer 5                     | 0.0844 |
| Posterior auditory area                           | 0.0450 |
| Posterior auditory area, layer 2/3                | 0.0274 |
| Posterior auditory area, layer 5                  | 0.0358 |
| Posterior auditory area, layer 6b                 | 0.0412 |
| Posterior auditory area, layer 4                  | 0.0450 |
| Posterior auditory area, layer 6a                 | 0.0412 |
| Anterior cingulate area, ventral part, layer 5    | 0.0666 |
| Agranular insular area, posterior part, layer 2/3 | 0.0358 |
| Agranular insular area, posterior part, layer 6a  | 0.0717 |
| Agranular insular area, posterior part, layer 5   | 0.0420 |
| Perirhinal area                                   | 0.0666 |
| Perirhinal area, layer 6b                         | 0.0709 |
| Perirhinal area, layer 5                          | 0.0450 |
| Perirhinal area, layer 6a                         | 0.0557 |
| Perirhinal area, layer 2/3                        | 0.0358 |
| Ectorhinal area                                   | 0.0923 |
| Ectorhinal area/Layer 2/3                         | 0.0599 |
| Ectorhinal area/Layer 6a                          | 0.0367 |
| Ectorhinal area/Layer 5                           | 0.0450 |
| Ectorhinal area/Layer 6b                          | 0.0450 |
| Frontal pole, cerebral cortex                     | 0.0335 |
| Frontal pole, layer 2/3                           | 0.0219 |
| Frontal pole, layer 1                             | 0.0358 |
| Anteromedial visual area, layer 2/3               | 0.0656 |
| Anteromedial visual area, layer 5                 | 0.0889 |
| Anteromedial visual area, layer 4                 | 0.0450 |
| Temporal association areas                        | 0.0599 |
| Temporal association areas, layer 2/3             | 0.0450 |
| Temporal association areas, layer 5               | 0.0358 |
| Temporal association areas, layer 6b              | 0.0666 |
| Temporal association areas, layer 4               | 0.0358 |
| Temporal association areas, layer 6a              | 0.0436 |

**Table S5. Regional comparison of monocyte infiltration in the brain during *T. gondii* infection (pink rows) or LPS treatment (blue rows). These data are represented in the volcano plot in Figure 8E.**

\* Benjamini-Hochberg correction for false discovery rate;  $p < 0.1$

† Regions within the reference atlas that could not be reliably assigned to a single brain region

| Reference Atlas Region Name                          | Normalized p value* |
|------------------------------------------------------|---------------------|
| Middle cerebellar peduncle                           | 0.0435              |
| Epithalamus related                                  | 0.0961              |
| Habenular commissure                                 | 0.0369              |
| Basic cell groups and regions                        | 0.0621              |
| Flocculus                                            | 0.0550              |
| Lingula (l)                                          | 0.0675              |
| Brain stem                                           | 0.0849              |
| Midbrain reticular nucleus                           | 0.0418              |
| Interstitial nucleus of Cajal                        | 0.0224              |
| Nucleus of Darkschewitsch                            | 0.0775              |
| Red nucleus                                          | 0.0337              |
| Midbrain reticular nucleus, retrorubral area         | 0.0790              |
| Midbrain, sensory related                            | 0.0822              |
| Inferior colliculus                                  | 0.0438              |
| Nucleus ambiguus, ventral division                   | 0.0530              |
| Pontine central gray                                 | 0.0636              |
| Tegmental reticular nucleus                          | 0.0377              |
| Interbrain                                           | 0.0340              |
| Hypothalamus                                         | 0.0199              |
| Periventricular region                               | 0.0512              |
| Anteroventral periventricular nucleus                | 0.0171              |
| Vascular organ of the lamina terminalis              | 0.0495              |
| Periventricular hypothalamic nucleus, posterior part | 0.0948              |
| Medial preoptic area                                 | 0.0381              |
| Suprachiasmatic nucleus                              | 0.0407              |
| Dorsomedial nucleus of the hypothalamus              | 0.0492              |
| Ventrolateral preoptic nucleus                       | 0.0534              |
| Hypothalamic medial zone                             | 0.0111              |
| Mammillary body                                      | 0.0213              |
| Medial mammillary nucleus                            | 0.0148              |
| Tuberomammillary nucleus                             | 0.0223              |
| Tuberomammillary nucleus, ventral part               | 0.0236              |
| Tuberomammillary nucleus, dorsal part                | 0.0504              |
| Lateral mammillary nucleus                           | 0.0019              |

|                                                         |        |
|---------------------------------------------------------|--------|
| Medial preoptic nucleus                                 | 0.0268 |
| Anterior hypothalamic nucleus                           | 0.0494 |
| Ventromedial hypothalamic nucleus                       | 0.0089 |
| Periventricular zone                                    | 0.0846 |
| Arcuate hypothalamic nucleus                            | 0.0150 |
| Supraoptic nucleus                                      | 0.0351 |
| Periventricular hypothalamic nucleus, intermediate part | 0.0759 |
| Hypothalamic lateral zone                               | 0.0456 |
| Zona incerta                                            | 0.0700 |
| Fields of Forel                                         | 0.0645 |
| Retrochiasmatic area                                    | 0.0338 |
| Thalamus, polymodal association cortex related          | 0.0819 |
| Paraventricular nucleus of the thalamus                 | 0.0798 |
| Epithalamus                                             | 0.0321 |
| Lateral habenula                                        | 0.0652 |
| Medial habenula                                         | 0.0332 |
| Subgeniculate nucleus                                   | 0.0487 |
| Intermediodorsal nucleus of the thalamus                | 0.0386 |
| Peripeduncular nucleus                                  | 0.0686 |
| Cerebrum                                                | 0.0682 |
| Magnocellular nucleus                                   | 0.0868 |
| Medial septal nucleus                                   | 0.0220 |
| Striatum ventral region                                 | 0.0784 |
| Olfactory tubercle                                      | 0.0390 |
| Septohippocampal nucleus                                | 0.0873 |
| Cerebral cortex                                         | 0.0788 |
| Clastrum                                                | 0.0091 |
| Cortical plate                                          | 0.0735 |
| Piriform-amygdalar area                                 | 0.0300 |
| Nucleus of the lateral olfactory tract, molecular layer | 0.0381 |
| Postpiriform transition area                            | 0.0907 |
| Hippocampal region                                      | 0.0809 |
| Field CA1                                               | 0.0059 |
| Isocortex                                               | 0.0374 |
| Somatomotor areas                                       | 0.0559 |
| Primary motor area                                      | 0.0242 |
| Primary motor area, Layer 2/3                           | 0.0493 |
| Primary motor area, Layer 6a                            | 0.0037 |
| Primary motor area, Layer 1                             | 0.0816 |
| Primary motor area, Layer 5                             | 0.0414 |
| Secondary motor area, layer 6a                          | 0.0390 |

|                                                     |        |
|-----------------------------------------------------|--------|
| Secondary motor area, layer 6b                      | 0.0617 |
| Somatosensory areas                                 | 0.0102 |
| Unlabeled <sup>†</sup>                              | 0.0023 |
| Unlabeled <sup>†</sup>                              | 0.0179 |
| Unlabeled <sup>†</sup>                              | 0.0198 |
| Primary somatosensory area                          | 0.0065 |
| Primary somatosensory area, barrel field            | 0.0319 |
| Primary somatosensory area, barrel field, layer 2/3 | 0.0930 |
| Primary somatosensory area, barrel field, layer 5   | 0.0040 |
| Primary somatosensory area, barrel field, layer 6a  | 0.0327 |
| Primary somatosensory area, barrel field, layer 4   | 0.0145 |
| Primary somatosensory area, mouth                   | 0.0054 |
| Primary somatosensory area, mouth, layer 2/3        | 0.0019 |
| Primary somatosensory area, mouth, layer 5          | 0.0067 |
| Primary somatosensory area, mouth, layer 6a         | 0.0766 |
| Primary somatosensory area, mouth, layer 4          | 0.0014 |
| Primary somatosensory area, trunk                   | 0.0002 |
| Primary somatosensory area, trunk, layer 2/3        | 0.0030 |
| Primary somatosensory area, trunk, layer 5          | 0.0018 |
| Primary somatosensory area, trunk, layer 6a         | 0.0658 |
| Primary somatosensory area, trunk, layer 4          | 0.0000 |
| Primary somatosensory area, nose, layer 5           | 0.0725 |
| Primary somatosensory area, upper limb              | 0.0640 |
| Primary somatosensory area, upper limb, layer 5     | 0.0044 |
| Primary somatosensory area, upper limb, layer 1     | 0.0912 |
| Primary somatosensory area, lower limb              | 0.0064 |
| Primary somatosensory area, lower limb, layer 2/3   | 0.0268 |
| Primary somatosensory area, lower limb, layer 5     | 0.0282 |
| Primary somatosensory area, lower limb, layer 1     | 0.0018 |
| Primary somatosensory area, lower limb, layer 6a    | 0.0036 |
| Gustatory areas                                     | 0.0544 |
| Gustatory areas, layer 2/3                          | 0.0295 |
| Gustatory areas, layer 1                            | 0.0432 |
| Primary auditory area, layer 5                      | 0.0916 |
| Primary auditory area, layer 4                      | 0.0153 |
| Ventral auditory area                               | 0.0325 |
| Ventral auditory area, layer 5                      | 0.0013 |
| Ventral auditory area, layer 4                      | 0.0972 |
| Ventral auditory area, layer 1                      | 0.0980 |
| Ventral auditory area, layer 6a                     | 0.0208 |
| Dorsal auditory area                                | 0.0783 |



|                                                      |        |
|------------------------------------------------------|--------|
| Dorsal auditory area, layer 5                        | 0.0034 |
| Dorsal auditory area, layer 4                        | 0.0794 |
| Posterior auditory area                              | 0.0651 |
| Posterior auditory area, layer 2/3                   | 0.0343 |
| Posterior auditory area, layer 5                     | 0.0637 |
| Posterior auditory area, layer 6a                    | 0.0384 |
| Anterior cingulate area, dorsal part, layer 6a       | 0.0468 |
| Anterior cingulate area, ventral part                | 0.0249 |
| Anterior cingulate area, ventral part, layer 2/3     | 0.0407 |
| Anterior cingulate area, ventral part, layer 6a      | 0.0174 |
| Anterior cingulate area, ventral part, layer 5       | 0.0397 |
| Anterior cingulate area, ventral part, layer 6b      | 0.0040 |
| Agranular insular area, posterior part               | 0.0022 |
| Agranular insular area, posterior part, layer 2/3    | 0.0217 |
| Agranular insular area, posterior part, layer 1      | 0.0016 |
| Agranular insular area, posterior part, layer 5      | 0.0102 |
| Retrosplenial area, lateral agranular part, layer 6b | 0.0469 |
| Perirhinal area                                      | 0.0014 |
| Perirhinal area, layer 6b                            | 0.0064 |
| Perirhinal area, layer 5                             | 0.0086 |
| Perirhinal area, layer 6a                            | 0.0047 |
| Perirhinal area, layer 2/3                           | 0.0027 |
| Perirhinal area, layer 1                             | 0.0153 |
| Ectorhinal area                                      | 0.0040 |
| Ectorhinal area/Layer 2/3                            | 0.0129 |
| Ectorhinal area/Layer 6a                             | 0.0357 |
| Ectorhinal area/Layer 5                              | 0.0489 |
| Ectorhinal area/Layer 1                              | 0.0053 |
| Ectorhinal area/Layer 6b                             | 0.0813 |
| Unlabeled <sup>†</sup>                               | 0.0045 |
| Frontal pole, cerebral cortex                        | 0.0082 |
| Frontal pole, layer 2/3                              | 0.0050 |
| Frontal pole, layer 1                                | 0.0122 |
| Anteromedial visual area                             | 0.0560 |
| Anteromedial visual area, layer 2/3                  | 0.0320 |
| Anteromedial visual area, layer 5                    | 0.0075 |
| Anteromedial visual area, layer 4                    | 0.0394 |
| posteromedial visual area, layer 2/3                 | 0.0928 |
| posteromedial visual area, layer 4                   | 0.0235 |
| Anterolateral visual area, layer 5                   | 0.0383 |
| Anterolateral visual area, layer 4                   | 0.0620 |

|                                       |        |
|---------------------------------------|--------|
| Unlabeled†                            | 0.0002 |
| Temporal association areas            | 0.0096 |
| Temporal association areas, layer 2/3 | 0.0195 |
| Temporal association areas, layer 5   | 0.0030 |
| Temporal association areas, layer 4   | 0.0414 |
| Temporal association areas, layer 1   | 0.0679 |
| Temporal association areas, layer 6a  | 0.0277 |
| Orbital area, lateral part, layer 5   | 0.0659 |

**Movie S1. Monocyte motility at the BBB in a *T. gondii*-infected mouse at 4 dpi.** A representative video of a CCR2<sup>RFP/+</sup> mouse at 4 dpi with *T. gondii*. The brain was imaged through a cranial window using two-photon microscopy. Gray lines were added to outline the major vessels in the FOV (note: not all vessels were outlined).

**Movie S2. Monocyte motility at the BBB in a *T. gondii*-infected mouse at 15 dpi.** A representative video of a CCR2<sup>RFP/+</sup> mouse at 15 dpi with *T. gondii*. The brain was imaged through a cranial window using two-photon microscopy. Gray lines were added to outline the major vessels in the FOV (note: not all vessels were outlined).

**Movie S3. Analysis and registration pipeline for CCR2<sup>RFP/+</sup> mice.** A representative imaging dataset of CCR2-RFP cells from CCR2<sup>RFP/+</sup> mice infected with *T. gondii*. Monocyte data were warped into the Allen reference atlas using autofluorescence information. The density of detected cells registered to the atlas were converted to heatmaps and shown for five different infected mice and for the mean distribution across the five replicates.

## **Supplementary Materials and Methods**

### **Mouse Experiments**

Wild-type C57BL/6J and CCR2<sup>RFP/RFP</sup> mice were purchased from Jackson Labs. CCR2<sup>+RFP</sup> mice were bred in-house using homozygous CCR2<sup>RFP/RFP</sup> mice and WT C57BL/6J mice.

CCR2<sup>+RFP</sup>CX3CR1<sup>+GFP</sup> double reporter mice were bred in-house by crossing homozygous reporter mice (a gift from Dr. Andrea Tenner) with WT C57BL/6J mice.

### **Serum Cytokine Multiplex Assay**

Blood was isolated from anesthetized mice prior to perfusion and stored in coagulation tubes (BD Biosciences, San Jose, CA). Serum was isolated from coagulated blood by centrifugation per the manufacturer's recommendations and stored at -80°C. Cytokines were measured using the LegendPlex bead-based assay (Biolegend, San Diego, CA) per the kit instructions at a dilution of 1:2. Samples were analyzed on a Novocyte flow cytometer (Acea Biosciences, San Diego, CA).

### **Immunofluorescence Imaging**

For antibody staining, sections were rinsed in PBS for 1-2 min, and blocked and permeabilized in IFA buffer [1X PBS (Corning), 5% normal goat serum (Southern Biotech, Birmingham, AL), 0.3% Triton-x 100 (Thermo Fisher Scientific)] for 2-4 hr. Antibodies against collagen IV (1:500; Abcam, Cambridge, MA), Glut-1 (1:500; Millipore), IBA-1 (1:500; WAKO), RFP (1:400; Rockland), or CST-1 (1:200 a gift from Dr. Louis Weiss (1) were diluted in IFA buffer and incubated with sections for 16 hr (anti-CST-1, IBA-1, and RFP) or 48 hr (Glut-1, collagen IV). Following washes in 1X PBS, secondary antibodies were diluted at 1:500 in IFA buffer and

incubated with sections for 24 hr. Nuclei were stained just prior to the final wash using Hoechst dye (1:20,000; Sigma).

### **Microglia and RFP<sup>+</sup> Cell Quantification**

Microglia were quantified using the Spot counting function in Imaris on 20x magnification confocal images from CCR2<sup>+RFP</sup>CX3CR1<sup>+GFP</sup> reporter mice infected with *T. gondii*. At least 18 individual fields of view within the isocortex were selected in two independent brain sections per animal. Threshold values for quantification were determined for RFP and GFP channels by visual inspection to ensure that cells were counted accurately. In addition, GFP channel threshold values were selected that only included cells with microglia morphology and high GFP expression to mitigate counting of GFP<sup>lo</sup> cells.

### **Fixed Tissue Apoptosis Staining**

Fixed brain tissue sections (25  $\mu$ m) were removed from cryopreservation media and blocked, permeabilized, and stained with anti-RFP antibody, as described above. After staining, sections were treated per the kit instructions of the TUNEL Andy Flour 647 Apoptosis Detection kit (GeneCopoeia, Rockville, MD). DNase was applied for 20 minutes to tissue sections generate to positive control data, and nuclei were counterstained with Hoechst (1:20,000; Sigma). Sections were imaged at 20x magnification on a Leica SP8 microscope and quantified using FIJI software (NIH). Each image was divided into 180  $\mu$ m squares to facilitate quantification, and thresholding was applied to each channel to isolate signal and measure field area covered. For TUNEL quantification, a mask was created using the nuclear signal, and the area of 647 nm signal within the mask was measured.

## **Cranial Window Implantation**

Mice were anesthetized with isoflurane in O<sub>2</sub> (2% for induction, 1-1.5% for maintenance, Patterson Veterinary, Devens, MA). To provide systemic and local perioperative analgesia, Carprofen (10 mg/kg, s.c., Zoetis) and topical 2% lidocaine hydrochloride jelly (Akorn, Lake Forest, IL) were administered, respectively. Ringer's lactate solution (0.2 mL/20 g/hr, s.c.) was given to replace fluid loss. Sterile eye ointment (Rugby, Livonia, MI) was used to prevent corneal drying. All surgical tools were sterilized using a hot glass bead sterilizer (Germinator 500). Following sterilization with Povidone-iodine, the scalp and underlying connective tissue were removed to expose the parietal and interparietal bone, and the right temporal muscle was detached from the superior temporal line. The skull was dried using ethanol (70% in DI water) and a thin layer of the tissue adhesive Vetbond (3M) was applied. Custom-printed ABS headplates were attached using the acrylic resin Ortho-Jet BCA (Lang Dental, Wheeling, IL) at an angle parallel to the skull. A small craniotomy (3 mm) was performed over the right hemisphere 2.5 mm anterior and 3 mm lateral lambda. GELFOAM sterile sponges (Patterson Veterinary) pre-soaked in sterile saline were used to absorb bleeding from the dura. Surgery was terminated if dural tears or parenchymal bleeding was observed (1 of 11 mice). A 4 mm glass coverslip (World Precision Instruments, Sarasota, FL) was placed over the exposed brain and pressed against thinned bone surrounding the craniotomy, and the edges were affixed to the skull first with a thin layer of Vetbond and second with acrylic resin. Following surgery, mice recovered in their home cage over a warm heating pad until normal behavior resumed (~15-30 min). Post-operative care consisted of daily Carprofen injections (10 mg/kg, s.c.) for at least 4 days following surgery, ending at least 1 day prior to two-photon imaging. Mice with post-operative bleeding (2 of 11 mice) were excluded from the study.

## **Blinding**

Blinding was done for the two-photon microscopy experiments. The researcher who performed craniotomies was blinded as to whether the mice would be subsequently injected with PBS (control group) or with *T. gondii* (infected group). In addition, the researcher who performed the two-photon imaging was blinded as to whether the mice being imaged were control or infected mice.

## **Two-Photon Image Processing**

During two-photon imaging, autofluorescent particles in both the red and green channels (thought to be lipofuscin inclusions) were detected. To visualize the red fluorescence specific to monocytes, ratiometric images on a per pixel basis were generated using the Image Calculator function in FIJI, followed by adjustment of the brightness applied equally across the entire image. For quantification of monocyte accumulation, RFP area was quantified by thresholding every image using the same upper limit value for every mouse and using the Measure function in FIJI.

## **Whole Brain Cell Segmentation Analysis**

For cell detection, a pixel classifier was trained in ilastik on a subset of CCR2<sup>RFP/+</sup> imaging data from a *T. gondii*-infected mouse at 15 dpi (2). The classifier was applied to the five CCR2<sup>RFP/+</sup> mice infected with *T. gondii* and four LPS-injected mice. For LPS datasets the classifier had a slight modification made to maintain the same behavior while accounting for the different conditions. Segmented cells were extracted from the output probability mask output using ilastik's built-in identity-preserving hysteresis thresholding with the following parameters:

sigmas= 1,1,1, size range= 8, 1000000, thresholds= 0.2, 0.7. Cell coordinates were defined as the local maxima within segmented cells. Using alignment procedures previously described (3), cytoarchitectural autofluorescence signal was used to locate cell coordinates in the annotated Allen reference atlas, version 2 (<http://alleninstitute.org/>). Unlike the original ClearMap release, Advanced Neuroimaging Tools (ANTs) was used for registration (4). Despite the propensity of the iDISCO<sup>+</sup> protocol to quench fluorescent proteins, we noted intact GFP fluorescence from the *T. gondii* in the autofluorescence channel. The GFP signal did not affect the quality of registration. Chromatic aberration correction was done using an affine registration between the autofluorescence and CCR2-RFP channels and applied to detected cell coordinates. Alignment to the Allen atlas was done using sequential rigid, affine, and symmetric normalization algorithms that were applied to cells. Cells were then assigned to voxels in the lower-resolution (25  $\mu\text{m}^3$ ) reference atlas and given a region designation based on the voxel location in the annotated atlas. Given the hierarchical structure of the atlas, parent regions inherited the cell counts and volume of their children. Due to dissection inconsistencies, main olfactory bulb, accessory olfactory bulb, anterior olfactory nucleus, olfactory nerve, and optic chiasm were excluded from analysis. Individual and mean heatmaps were generated using ClearMap. Example images were passed through a 3-pixel wide median filter to reduce camera noise, and the intensity was matched between *T. gondii*-infected, LPS and PBS control groups.

### **Validation of Cell Detection and Segmentation**

Two independent raters not involved in classifier training manually counted RFP<sup>+</sup> cells in a representative 3D substack of the classifier training using FIJI (5). Due to variability in approximating cell centers, correlation between raters and classifier was determined by taking



the sum of detected cells within spatial bins representing cubic volumes with 10, 20, 30, 40, and 50 voxels per side across the image. For each bin size, the Pearson correlation was calculated for the binned cell distribution between raters.

## Statistical Methods

For flow cytometry experiments, cytokine multiplex, and monocyte accumulation data comparing multiple groups, one-way ANOVA with Tukey post-hoc test was used.

CCR2<sup>RFP/+</sup>CX3CR1<sup>GFP/+</sup> monocyte frequencies were evaluated using a two-tailed Student's *t* test. Changes in monocyte speed and motility mode were evaluated by comparing the linear regression curves over the time-course and testing for differences in slope by two-tailed student's *t* test. Similarly, weight loss was evaluated by comparing slopes of linear regression analysis applied to portions of the weight loss curves and testing for differences between wild-type C57BL/6J mice and CCR2<sup>RFP/+</sup>CX3CR1<sup>GFP/+</sup> reporter mice using a Student's *t* test. Kaplan-Meier survival curves were compared using a log-rank test (Graphpad Prism) \**p* < 0.05; \*\**p* < 0.01; \*\*\**p* < 0.001.; \*\*\*\**p* < 0.0001. All error bars are given as the standard error of the mean unless otherwise indicated. Graphs were generated using Graphpad Prism or coded using R software and the ggplot2 package(6, 7) .

Statistical analysis of monocyte distribution was done using custom python scripts (Python Software Foundation, <https://www.python.org/>). To compare the distribution of monocytes against random chance, cells from each animal were first placed into the reference atlas at 25 μm<sup>3</sup> voxel resolution. Voxels, with their associated cell counts, were shuffled 1000 times for each animal. The median cell count by region calculated from the shuffle procedure was used to estimate the random chance level of monocyte density. A two-tailed Student *t*-test

with Benjamini-Hochberg correction ( $\alpha=0.1$ ) was performed on cell densities of experimental and shuffled groups for each region. Standard deviation and mean across animals for both groups was also calculated. For comparison of the *T. gondii* and LPS conditions, a two-tailed Student t-test with Benjamini-Hochberg correction ( $\alpha=0.1$ ) was performed for each region between the two groups.

## References

1. Tomita T, *et al.* (2013) The *Toxoplasma gondii* cyst wall protein CST1 is critical for cyst wall integrity and promotes bradyzoite persistence. *PLoS Pathogens* 9(12):e1003823.
2. Sommer C, Strahle C, Köthe U, & Hamprecht FA (2011) ilastik: Interactive Learning and Segmentation Toolkit. *Eighth IEEE International Symposium on Biomedical Imaging (ISBI)*. pp 230-233.
3. Renier N, *et al.* (2016) Mapping of Brain Activity by Automated Volume Analysis of Immediate Early Genes. *Cell* 165(7):1789-1802.
4. Avants BB, *et al.* (2011) A reproducible evaluation of ANTs similarity metric performance in brain image registration. *NeuroImage* 54(3):2033-2044.
5. Schindelin J, *et al.* (2012) Fiji: an open-source platform for biological-image analysis. *Nature Methods* 9(7):676-682.
6. Wickham H (2009) *ggplot2: Elegant Graphics for Data Analysis* (Springer-Verlag New York) p 213.
7. Team RC (2013) R: A Language and Environment for Statistical Computing (R Foundation for statistical Computing Vienna, Austria), 3.3.3 (2017-03-06).
